# Supplementary material
Source: PubMed Central journal article supplement (PMC3837860)
Supplement: AAC.01176-13_zac012132371so1.pdf [file AAC.01176-13_zac012132371so1.pdf]

Supplemental Material

1  
2  
3  
4  
5  
6  
7  
8  
9  
10  
11  
12  
13  
14

Supplemental Figures

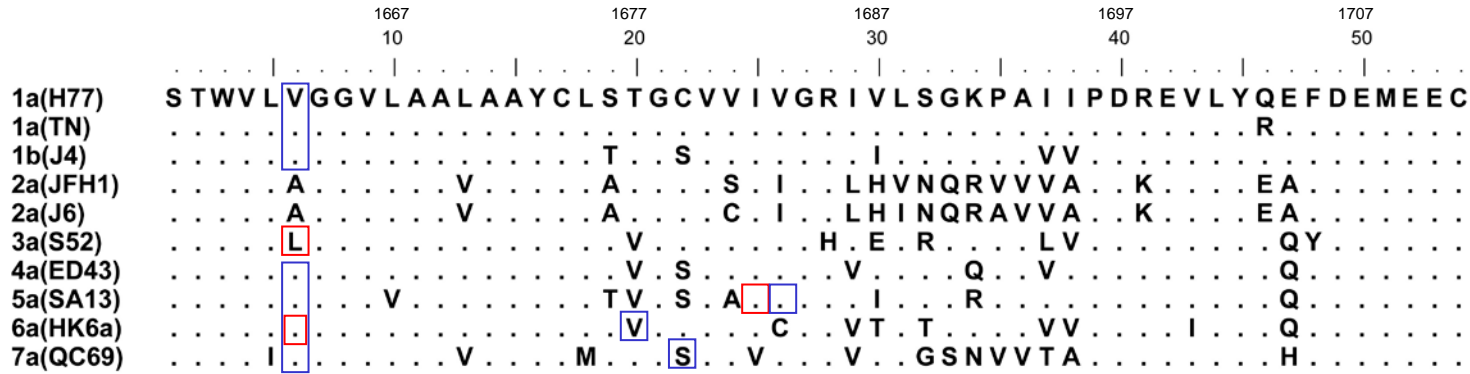

**Supplemental Figure 1. Alignment of NS4A genotype (isolate) sequences used in this study.** H77 (AF009606) absolute and relative reference numbers are given. Red box; position, at which J6/JFH1-based recombinants with NS3P/NS4A of the respective genotype (isolate) acquired cell culture adaptive amino acid substitutions (1). Blue box; position, at which J6/JFH1-based recombinants with NS4A of the respective genotype (isolate) acquired cell culture adaptive amino acid substitutions.

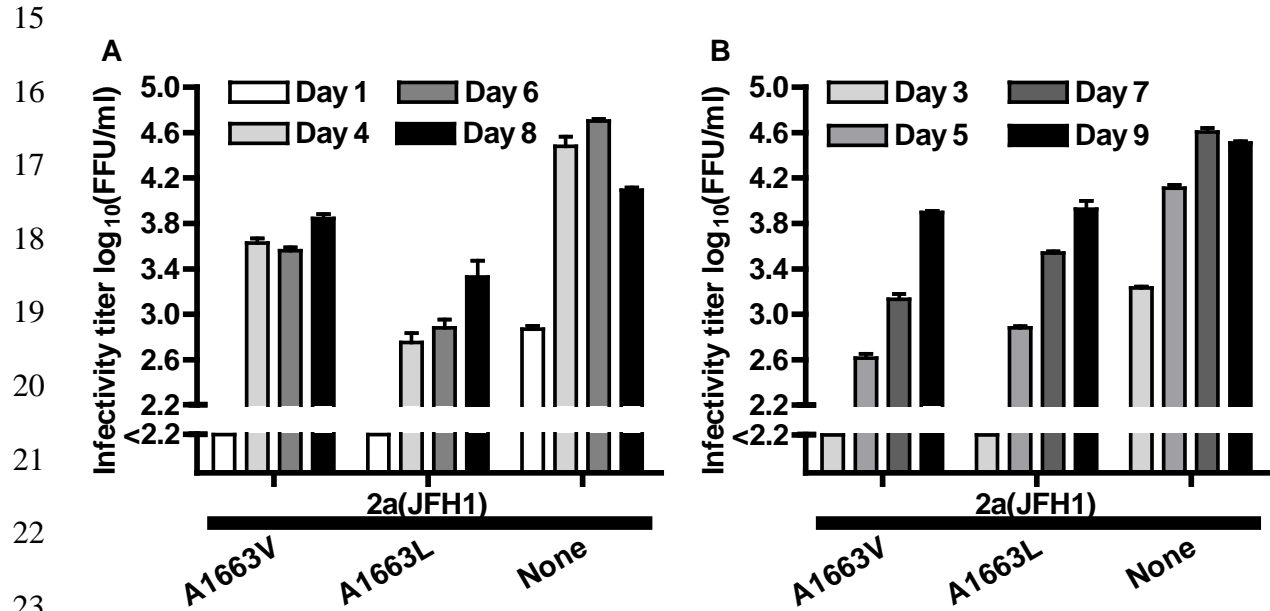

25 **Supplemental Figure 2. Substitution of genotype 2 specific alanine at aa position 1663 led to attenuation of J6/JFH1.** (A) Shown are  
 26 supernatant infectivity titers of cultures transfected with RNA transcripts of 2a(JFH1) and 2a(JFH1) recombinants with valine or leucine at  
 27 aa position 1663 (V is found for most genotype 1, 4, 5, 6, and 7 isolates; L is found for most genotype 3 isolates) (Supplemental Figure 1).  
 28 Titers are means of 3 replicates with SEM; lower cut-off 2.2  $\log_{10}$  FFU/ml, indicated by column brake. (B) Supernatant infectivity titers of  
 29 a subsequent 2nd passage kinetic experiment inoculated at an MOI of 0.01. Titers are means of 3 replicates with SEM; lower cut-off 2.2  
 30  $\log_{10}$  FFU/ml. 2a(JFH1)A1663V was genetically stable, while for 2a(JFH1)A1663L, L had reverted to A. All aa positions are annotated  
 31 with H77 (AF009606) absolute reference numbers.

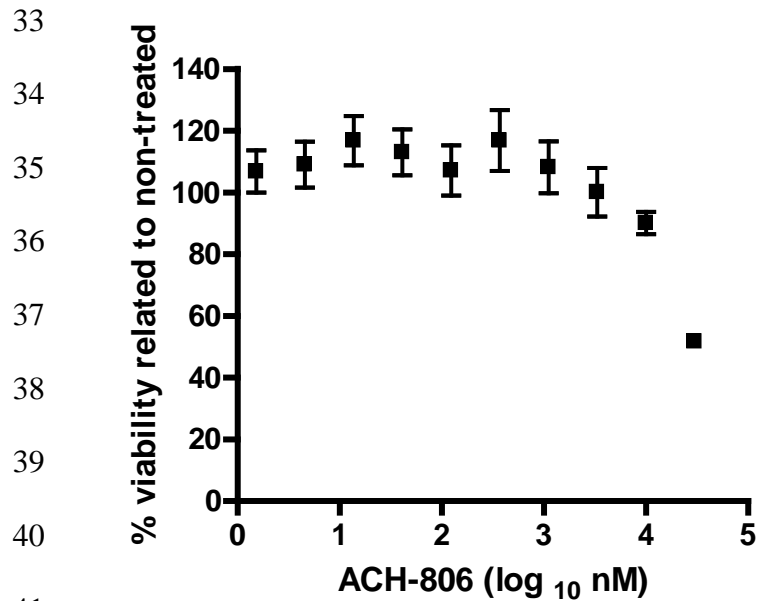

43 **Supplemental Figure 3. Cytotoxicity profile of NS4A inhibitor ACH-806.** 5000 Huh7.5 cells were plated per well of 96 well plates.  
 44 After 1 day incubation, culture medium was exchanged. 24 and 48 hrs thereafter, ACH-806 at the indicated doses was administered; each  
 45 dose was tested in triplicate. 24 hrs thereafter, CellTiter 96 AQueous One Solution Cell Proliferation Assay (Promega) was used to evaluate  
 46 cytotoxic effects (see Materials and Methods). Percentages of viability were calculated by comparison of optical density (490 nm) values of  
 47 treated cultures to the mean value of six non-treated cultures. Error bars indicate SEM.

48

49 **Supplemental Tables**

50 **Supplemental Table 1.** Coding nucleotide changes of J6/JFH1-J6(NS4A) recombinant in Huh7.5 cells

51

| HCV gene                     |               | NS5B                             | NS5B       |
|------------------------------|---------------|----------------------------------|------------|
| <b>Nucleotide position †</b> |               |                                  |            |
| J6/JFH1-J6(NS4A)             |               | 8369                             | 9066       |
| H77 abs ref                  |               | 8304                             | 9001       |
| <b>pJ6JFH-J6(NS4A)</b>       |               | <b>A</b>                         | <b>A</b>   |
| <i>ORIGINAL CONSTRUCT</i>    | Passage (Day) | Infectivity Titer Log10 (FFU/ml) |            |
| <i>1st Transfection</i>      | 1st (3)       | 4.3                              | G/A G/A    |
| <i>2nd Transfection</i>      | 1st (7)       | 4.6                              | • •        |
| <b>Amino acid position †</b> |               |                                  |            |
| J6/JFH1-J6(NS4A)             |               | 2677                             | 2909       |
| H77 abs ref                  |               | 2655                             | 2887       |
| <b>Amino acid change</b>     |               | <b>T→A</b>                       | <b>H→R</b> |

52

53

54

55

56

57

58

59 † Positions are numbered according to the HCV sequence of J6/JFH1-J6(NS4A) and with H77 (AF009606) absolute reference numbers.

60 H77 absolute nt or aa reference numbers were determined by entering the plasmid nt sequence or the derived polyprotein sequence in the

61 eu HCV database number tool (2). Positions with quasispecies are written with two capital letters in case of a 50/50 quasispecies and with

62 capital letter/lower case letter in case of a dominant and a minor sequence. Positions were included, at which coding nucleotide changes

63 occurred at least as a 50/50 quasispecies in at least one ORF. Dots indicate identity with the original plasmid sequence. Highlighted

64 positions are mutations engineered into the original construct. Indicated are number of viral passage (day of the passage experiment, at

65 which supernatant was obtained) as well as the peak infectivity titer recorded in the respective passage experiment. NS, non-structural  
66 protein. NS3P, NS3 protease domain. NS3H, NS3 helicase domain.

67

68 **Supplemental Table 2.** Coding nucleotide changes of original and adapted J6/JFH1-H77(NS4A) recombinants in Huh7.5 cells

| 69 | HCV gene                                            | E2             | p7                    | NS3H       | NS4A       | NS5A       | NS5A       | NS5B       |     |
|----|-----------------------------------------------------|----------------|-----------------------|------------|------------|------------|------------|------------|-----|
|    | <b>Nucleotide position †</b>                        |                |                       |            |            |            |            |            |     |
| 70 | J6/JFH1-H77(NS4A)                                   | 1679           | 2667                  | 4458       | 5340       | 6284       | 6677       | 8970       |     |
|    | H77 abs ref                                         | 1680           | 2656                  | 4447       | 5329       | 6273       | 6666       | 8905       |     |
| 71 | pJ6/JFH1-H77(NS4A)                                  | T              | T                     | G          | T          | C          | A          | T          |     |
|    | <b>ORIGINAL CONSTRUCT</b>                           | <b>Passage</b> | <b>Infectivity</b>    |            |            |            |            |            |     |
| 72 |                                                     | <b>(Day)</b>   | <b>Log10 (FFU/ml)</b> |            |            |            |            |            |     |
|    | <i>1st Transfection</i>                             | 1st (6)        | 4.1                   | •          | C/t        | •          | C          | •          |     |
| 73 | <i>2nd Transfection</i>                             | 1st (4)        | 4.2                   | C/t        | C          | A          | C          | T/C        |     |
|    | <b>CONSTRUCTS WITH INDICATED AMINO ACID CHANGES</b> |                |                       |            |            |            |            |            |     |
| 74 | F772S                                               | 1st (6)        | 4.7                   | •          | C          | A/g        | C          | •          | G/A |
|    | F772S,V1663A                                        | 1st (6)        | 3.5                   | •          | C          | •          | C          | •          | •   |
| 75 | <b>Amino acid position †</b>                        |                |                       |            |            |            |            |            |     |
|    | J6/JFH1-H77(NS4A)                                   | 447            | 776                   | 1373       | 1667       | 1982       | 2113       | 2877       |     |
| 76 | H77 abs ref                                         | 447            | 772                   | 1369       | 1663       | 1978       | 2109       | 2855       |     |
|    | <b>Amino acid change</b>                            | <b>F→L</b>     | <b>F→S</b>            | <b>R→Q</b> | <b>V→A</b> | <b>R→C</b> | <b>N→D</b> | <b>V→A</b> |     |

78 † Positions are numbered according to the HCV sequence of J6/JFH1-H77(NS4A) and with H77 (AF009606) absolute reference numbers.

79 For detailed description see Supplemental Table 1.

80

81 **Supplemental Table 3.** Coding nucleotide changes of original and adapted J6/JFH1-TN(NS4A) recombinants in Huh7.5 cells

| 82 | HCV gene                                            | p7       | p7             | NS2  | NS3P | NS3H | NS3H | NS3H | NS3H | NS4A | NS5A | NS5A | NS5A | NS5A | NS5A | NS5B |   |   |
|----|-----------------------------------------------------|----------|----------------|------|------|------|------|------|------|------|------|------|------|------|------|------|---|---|
| 83 | Nucleotide position †                               |          |                |      |      |      |      |      |      |      |      |      |      |      |      |      |   |   |
|    | J6/JFH1-TN(NS4A)                                    | 2667     | 2668           | 2835 | 3533 | 4286 | 4613 | 4626 | 4982 | 5340 | 6683 | 6948 | 7035 | 7402 | 7652 | 7919 |   |   |
|    | H77 abs ref                                         | 2656     | 2657           | 2824 | 3522 | 4275 | 4602 | 4615 | 4971 | 5329 | 6672 | 6937 | 7024 | 7402 | 7590 | 7854 |   |   |
| 84 | pJ6/JFH1-TN(NS4A)                                   | T        | C              | T    | A    | A    | T    | T    | A    | T    | A    | C    | A    | G    | A    | T    |   |   |
| 85 | <b>ORIGINAL CONSTRUCT</b>                           | Passage  | Infectivity    |      |      |      |      |      |      |      |      |      |      |      |      |      |   |   |
|    |                                                     | (Day)    | Log10 (FFU/ml) |      |      |      |      |      |      |      |      |      |      |      |      |      |   |   |
|    | <i>1st Transfection</i>                             | 1st (4)  | 3.6            | C    | •    | •    | •    | •    | A    | C    | •    | C    | •    | •    | •    | C    | G | • |
| 86 | <i>2nd Transfection</i>                             | 1st (4)  | 4.2            | C    | T    | A    | G    | G    | •    | •    | •    | C    | •    | •    | T    | •    | • | G |
|    | <b>CONSTRUCTS WITH INDICATED AMINO ACID CHANGES</b> |          |                |      |      |      |      |      |      |      |      |      |      |      |      |      |   |   |
| 87 | F772S                                               | 1st (6)  | 4.3            | C    | •    | •    | •    | G/A  | •    | •    | G/A  | C    | G/A  | T/C  | •    | •    | • | • |
|    | F772S,V1663A                                        | 1st (10) | 3.4            | C    | •    | •    | •    | •    | •    | •    | •    | C    | •    | •    | •    | •    | • | • |
| 88 | Amino acid position †                               |          |                |      |      |      |      |      |      |      |      |      |      |      |      |      |   |   |
|    | J6/JFH1-TN(NS4A)                                    | 776      | 832            | 1065 | 1316 | 1425 | 1429 | 1548 | 1667 | 2115 | 2203 | 2232 | 2354 | 2438 | 2527 |      |   |   |
| 89 | H77 abs ref                                         | 772      | 828            | 1061 | 1312 | 1421 | 1425 | 1544 | 1663 | 2111 | 2199 | 2228 | 2354 | 2414 | 2505 |      |   |   |
|    | Amino acid change                                   | F→S      | L→H            | I→V  | I→V  | L→M  | I→T  | N→D  | V→A  | K→E  | A→V  | D→V  | Q→H  | T→A  | L→V  |      |   |   |

91 † Positions are numbered according to the HCV sequence of J6/JFH1-TN(NS4A) and with H77 (AF009606) absolute reference numbers.

92 For detailed description see Supplemental Table 1.

93

94 **Supplemental Table 4.** Coding nucleotide changes of original and adapted J6/JFH1-J4(NS4A) recombinants in Huh7.5 cells

| 95  | HCV gene                                            |         | E1                | p7   | NS2  | NS2  | NS4A | NS5A |
|-----|-----------------------------------------------------|---------|-------------------|------|------|------|------|------|
|     | <b>Nucleotide position †</b>                        |         |                   |      |      |      |      |      |
| 96  | J6/JFH1-J4(NS4A)                                    |         | 962               | 2667 | 2948 | 2952 | 5340 | 6872 |
|     | H77 abs ref                                         |         | 963               | 2656 | 2937 | 2941 | 5329 | 6861 |
| 97  | pJ6/JFH1-J4(NS4A)                                   |         | A                 | T    | G    | G    | T    | A    |
|     | <i>ORIGINAL CONSTRUCT</i>                           | Passage | Infectivity Titer |      |      |      |      |      |
| 98  |                                                     | (Day)   | Log10 (FFU/ml)    |      |      |      |      |      |
|     | <i>1st Transfection</i>                             | 1st (6) | 4.2               | G/A  | •    | A    | •    | C C  |
| 99  | <i>2nd Transfection</i>                             | 1st (3) | 4.3               | •    | C/t  | •    | T/G  | C •  |
|     | <b>CONSTRUCTS WITH INDICATED AMINO ACID CHANGES</b> |         |                   |      |      |      |      |      |
| 100 | F772S                                               | 1st (6) | 4.6               | •    | C    | •    | •    | C •  |
|     | F772S,V1663A                                        | 1st (3) | 4.0               | •    | C    | •    | •    | C •  |
| 101 | <b>Amino acid position †</b>                        |         |                   |      |      |      |      |      |
|     | J6/JFH1-J4(NS4A)                                    |         | 208               | 776  | 870  | 871  | 1667 | 2178 |
| 102 | H77 abs ref                                         |         | 208               | 772  | 866  | 867  | 1663 | 2174 |
|     | <b>Amino acid change</b>                            |         | T→A               | F→S  | V→M  | R→L  | V→A  | M→L  |

103

104 † Positions are numbered according to the HCV sequence of J6/JFH1-J4(NS4A) and with H77 (AF009606) absolute reference numbers.

105 For detailed description see Supplemental Table 1.

106



107 **Supplemental Table 5.** Coding nucleotide changes of original and adapted J6/JFH1-ED43(NS4A) recombinants in Huh7.5 cells

108

| HCV gene                                            |                      | p7                                      | NS2        | NS2        | NS3P       | NS4A       | NS4A       | NS4B       | NS5A       | NS5A       | NS5A       |     |
|-----------------------------------------------------|----------------------|-----------------------------------------|------------|------------|------------|------------|------------|------------|------------|------------|------------|-----|
| <b>Nucleotide position †</b>                        |                      |                                         |            |            |            |            |            |            |            |            |            |     |
| pJ6/JFH1-ED43(NS4A)                                 |                      | 2667                                    | 2859       | 2988       | 3533       | 5340       | 5349       | 5856       | 7149       | 7164       | 7611       |     |
| H77 abs ref                                         |                      | 2656                                    | 2848       | 2977       | 3522       | 5329       | 5338       | 5845       | 7150       | 7162       | 7559       |     |
| pJ6/JFH1-ED43(NS4A)                                 |                      | T                                       | A          | T          | A          | T          | T          | T          | T          | T          | C          |     |
| <b>ORIGINAL CONSTRUCT</b>                           | <b>Passage (Day)</b> | <b>Infectivity Titer Log10 (FFU/ml)</b> |            |            |            |            |            |            |            |            |            |     |
| <i>1st Transfection</i>                             | T (57)               | 2.8                                     | C          | G/A        | •          | G          | •          | C          | C          | •          | A          | T/C |
|                                                     | 1st (10)             | 4.6                                     | C          | •          | •          | G          | C/T        | C/T        | C          | •          | A          | •   |
|                                                     | 3rd (6)              | 4.2                                     | C          | •          | •          | G          | C          | •          | C/T        | •          | A          | •   |
| <i>2nd Transfection</i>                             | 1st (4)              | 4.2                                     | •          | •          | C          | •          | C          | •          | •          | C/T        | •          | •   |
| <b>CONSTRUCTS WITH INDICATED AMINO ACID CHANGES</b> |                      |                                         |            |            |            |            |            |            |            |            |            |     |
| <b>F772S</b>                                        |                      |                                         |            |            |            |            |            |            |            |            |            |     |
| <i>1st Transfection</i>                             | 1st (7)              | 4.0                                     | C          | •          | •          | •          | C          | •          | •          | •          | •          | •   |
| <i>2nd Transfection</i>                             | 1st (6)              | 3.9                                     | C          | •          | •          | •          | C          | •          | •          | •          | •          | •   |
| V1663A                                              | 1st (18)             | 4.2                                     | C          | •          | •          | •          | C          | •          | •          | •          | •          | •   |
| F772S,V1663A                                        | 1st (6)              | 3.9                                     | C          | •          | •          | •          | C          | •          | •          | •          | •          | •   |
| I879T,V1663A                                        | 1st (9)              | 4.3                                     | •          | •          | C          | •          | C          | •          | •          | •          | •          | •   |
| <b>Amino acid position †</b>                        |                      |                                         |            |            |            |            |            |            |            |            |            |     |
| J6JFH-ED43(NS4A)                                    |                      | 776                                     | 840        | 883        | 1065       | 1667       | 1670       | 1839       | 2270       | 2275       | 2424       |     |
| H77 abs ref                                         |                      | 772                                     | 836        | 879        | 1061       | 1663       | 1666       | 1835       | 2270       | 2275       | 2402q      |     |
| <b>Amino acid change</b>                            |                      | <b>F→S</b>                              | <b>K→R</b> | <b>I→T</b> | <b>I→V</b> | <b>V→A</b> | <b>V→A</b> | <b>V→A</b> | <b>I→T</b> | <b>M→K</b> | <b>S→L</b> |     |

111

112

113

114

115

116

117

118

119

120

121 † Positions are numbered according to the HCV sequence of J6/JFH1-ED43(NS4A) and with H77 (AF009606) absolute reference  
 122 numbers. T, indicates that viruses from transfection culture were analysed. For detailed description see Supplemental Table 1.

123

124 **Supplemental Table 6.** Coding nucleotide changes of original and adapted J6/JFH1-SA13(NS4A) recombinants in Huh7.5 cells

| 125 | HCV gene                                            | E2             | p7                       | p7         | NS3P       | NS3H       | NS3H       | NS4A       | NS4A       | NS5A       | NS5A       | NS5A       |          |          |
|-----|-----------------------------------------------------|----------------|--------------------------|------------|------------|------------|------------|------------|------------|------------|------------|------------|----------|----------|
|     | <b>Nucleotide position †</b>                        |                |                          |            |            |            |            |            |            |            |            |            |          |          |
| 126 | J6/JFH1-SA13(NS4A)                                  | 1554           | 2600                     | 2667       | 3533       | 4431       | 4458       | 5340       | 5399       | 6558       | 6809       | 7150       |          |          |
|     | H77 abs ref                                         | 1555           | 2589                     | 2656       | 3522       | 4420       | 4447       | 5329       | 5388       | 6547       | 6798       | 7151       |          |          |
| 127 | <b>pJ6/JFH1-SA13(NS4A)</b>                          | <b>T</b>       | <b>A</b>                 | <b>T</b>   | <b>A</b>   | <b>C</b>   | <b>G</b>   | <b>T</b>   | <b>G</b>   | <b>A</b>   | <b>T</b>   | <b>A</b>   |          |          |
|     | <b>ORIGINAL CONSTRUCT</b>                           | <b>Passage</b> | <b>Infectivity Titer</b> |            |            |            |            |            |            |            |            |            |          |          |
| 128 |                                                     | <b>(Day)</b>   | <b>Log10 (FFU/ml)</b>    |            |            |            |            |            |            |            |            |            |          |          |
|     | <b>1st Transfection</b>                             | <b>1st (3)</b> | <b>3.6</b>               | <b>C/t</b> | <b>G</b>   | <b>C/t</b> | <b>•</b>   | <b>•</b>   | <b>•</b>   | <b>C</b>   | <b>T</b>   | <b>•</b>   | <b>•</b> | <b>G</b> |
| 129 | <b>CONSTRUCTS WITH INDICATED AMINO ACID CHANGES</b> |                |                          |            |            |            |            |            |            |            |            |            |          |          |
|     | <b>F772S,V1663A</b>                                 | <b>1st (8)</b> | <b>4.3</b>               | <b>T/c</b> | <b>•</b>   | <b>C</b>   | <b>G</b>   | <b>T/C</b> | <b>T</b>   | <b>C</b>   | <b>•</b>   | <b>G</b>   | <b>A</b> | <b>•</b> |
| 130 | <b>F772S,V1663A,V1683F</b>                          | <b>1st (9)</b> | <b>3.7</b>               | <b>•</b>   | <b>•</b>   | <b>C</b>   | <b>•</b>   | <b>•</b>   | <b>•</b>   | <b>C</b>   | <b>T</b>   | <b>•</b>   | <b>•</b> | <b>•</b> |
|     | <b>Amino acid position †</b>                        |                |                          |            |            |            |            |            |            |            |            |            |          |          |
| 131 | J6/JFH1-SA13(NS4A)                                  | 405            | 754                      | 776        | 1065       | 1364       | 1373       | 1667       | 1687       | 2073       | 2157       | 2270       |          |          |
|     | H77 abs ref                                         | 405            | 750                      | 772        | 1061       | 1360       | 1369       | 1663       | 1683       | 2069       | 2153       | 2270       |          |          |
| 132 | <b>Amino acid change</b>                            | <b>M→T</b>     | <b>K→E</b>               | <b>F→S</b> | <b>I→V</b> | <b>P→L</b> | <b>R→L</b> | <b>V→A</b> | <b>V→F</b> | <b>Q→R</b> | <b>S→T</b> | <b>I→M</b> |          |          |

133

134 † Positions are numbered according to the HCV sequence of J6/JFH1-SA13(NS4A) and with H77 (AF009606) absolute reference numbers.

135 For detailed description see Supplemental Table 1.

136

137 **Supplemental Table 7.** Coding nucleotide changes of original and adapted J6/JFH1-HK6a(NS4A) recombinants in Huh7.5 cells

138

| HCV gene                                                   |              | E2                    | p7   | NS2  | NS2  | NS3P | NS3P | NS3P | NS3H | NS4A | NS4A | NS4A | NS5A | NS5A | NS5B | NS5B | NS5B |     |
|------------------------------------------------------------|--------------|-----------------------|------|------|------|------|------|------|------|------|------|------|------|------|------|------|------|-----|
| <b>Nucleotide position †</b>                               |              |                       |      |      |      |      |      |      |      |      |      |      |      |      |      |      |      |     |
| J6/JFH1-HK6a(NS4A)                                         |              | 2291                  | 2667 | 2843 | 3408 | 3630 | 3645 | 3666 | 4017 | 5340 | 5382 | 5412 | 6678 | 7142 | 8605 | 8751 | 8985 |     |
| H77 abs ref                                                |              | 2280                  | 2656 | 2832 | 3397 | 3619 | 3634 | 3655 | 4006 | 5329 | 5371 | 5401 | 6667 | 7143 | 8540 | 8686 | 8920 |     |
| pJ6/JFH1-HK6a(NS4A)                                        |              | A                     | T    | C    | C    | T    | C    | A    | C    | T    | T    | C    | A    | C    | G    | T    | A    |     |
| <b>CONSTRUCTS WITH INDICATED Passage Infectivity Titer</b> |              |                       |      |      |      |      |      |      |      |      |      |      |      |      |      |      |      |     |
| <b>AMINO ACID CHANGES</b>                                  | <b>(Day)</b> | <b>Log10 (FFU/ml)</b> |      |      |      |      |      |      |      |      |      |      |      |      |      |      |      |     |
| <b>F772S,V1663A</b>                                        |              |                       |      |      |      |      |      |      |      |      |      |      |      |      |      |      |      |     |
| 1st Transfection                                           | 1st (3)      | 4.0                   | •    | C    | •    | •    | •    | •    | C    | •    | C    | C    | •    | G    | T    | A/G  | C/T  | G/A |
| 2nd Transfection                                           | 1st (13)     | 4.0                   | T/A  | C    | A/C  | T/C  | C/T  | T    | •    | T/c  | C    | C/T  | •    | •    | •    | •    | •    | •   |
| F772S,E1105A,V1663A                                        | 1st (20)     | 3.7                   | •    | C    | •    | •    | •    | •    | C    | •    | C    | T/c  | •    | •    | •    | •    | •    | •   |
| F772S,V1663A,V1677A                                        | 1st (15)     | 4.1                   | •    | C    | •    | •    | •    | C/t  | A/g  | •    | C    | C    | C/T  | •    | •    | •    | •    | •   |
| F772S,E1105A,V1663A,V1677A                                 | 1st (8)      | 3.6                   | •    | C    | •    | •    | •    | •    | C    | •    | C    | C    | •    | •    | •    | •    | •    | •   |
| <b>Amino acid position †</b>                               |              |                       |      |      |      |      |      |      |      |      |      |      |      |      |      |      |      |     |
| J6JFH-HK6a(NS4A)                                           |              | 651                   | 776  | 835  | 1023 | 1097 | 1102 | 1109 | 1226 | 1667 | 1681 | 1691 | 2113 | 2268 | 2755 | 2804 | 2882 |     |
| H77 abs ref                                                |              | 647                   | 772  | 831  | 1019 | 1093 | 1098 | 1105 | 1222 | 1663 | 1677 | 1687 | 2109 | 2268 | 2733 | 2782 | 2860 |     |
| <b>Amino acid change</b>                                   |              | T→S                   | F→S  | L→I  | T→I  | L→S  | T→M  | *    | T→I  | V→A  | V→A  | T→I  | N→S  | P→S  | M→I  | L→P  | D→G  |     |

141

142

143

144

146

147 † Positions are numbered according to the HCV sequence of J6/JFH1-HK6a(NS4A) and with H77 (AF009606) absolute reference

148 numbers. For detailed description see Supplemental Table 1.

149 \*Amino acid change E→A/G encoded by nucleotide change A→C/G.

150

151 **Supplemental Table 8.** Coding nucleotide changes of original and adapted J6/JFH1-QC69(NS4A) recombinants in Huh7.5 cells

| 152 HCV gene                                        |               | E1                | E1   | E2   | p7   | p7   | NS2  | NS2  | NS2  | NS3P | NS4A | NS4A | NS4B | NS5A | NS5B | NS5B |   |
|-----------------------------------------------------|---------------|-------------------|------|------|------|------|------|------|------|------|------|------|------|------|------|------|---|
| Nucleotide position †                               |               |                   |      |      |      |      |      |      |      |      |      |      |      |      |      |      |   |
| 153 J6/JFH1-QC69(NS4A)                              |               | 1124              | 1469 | 2512 | 2667 | 2700 | 2975 | 3062 | 3158 | 3533 | 5340 | 5387 | 6132 | 6390 | 8721 | 8722 |   |
| H77 abs ref                                         |               | 1125              | 1470 | 2501 | 2656 | 2689 | 2964 | 3051 | 3147 | 3522 | 5329 | 5376 | 6121 | 6379 | 8656 | 8657 |   |
| 154 pJ6/JFH1-QC69(NS4A)                             |               | A                 | T    | A    | T    | T    | T    | G    | A    | A    | T    | A    | A    | A    | A    | T    |   |
| <i>CONSTRUCTS WITH INDICATED AMINO ACID CHANGES</i> | Passage (Day) | Infectivity Titer |      |      |      |      |      |      |      |      |      |      |      |      |      |      |   |
|                                                     |               | Log10 (FFU/ml)    |      |      |      |      |      |      |      |      |      |      |      |      |      |      |   |
| 155 F772S,V1663A                                    | 1st (10)      | 3.7               | •    | •    | G/A  | C    | •    | •    | A/G  | G/A  | G/A  | C    | T/a  | •    | •    | •    | • |
| F772S,V1663A,S1679C                                 | 1st (25)      | 3.6               | C/a  | •    | •    | C    | C/T  | •    | •    | •    | G    | C    | T    | •    | G    | C    | C |
| 156 F772S,V1663A,S1679C                             | 1st (22)      | 3.8               | •    | G/T  | •    | C    | •    | C/T  | •    | •    | •    | C    | T    | G/A  | •    | •    | • |
| F772S,I1061V,V1663A,S1679C                          | 1st (13)      | 3.8               | •    | •    | •    | C    | •    | •    | •    | •    | G    | C    | T    | •    | •    | •    | • |
| Amino acid position †                               |               |                   |      |      |      |      |      |      |      |      |      |      |      |      |      |      |   |
| J6JFH-QC69(NS4A)                                    |               | 262               | 377  | 724  | 776  | 787  | 879  | 908  | 940  | 1065 | 1667 | 1683 | 1931 | 2017 | 2794 |      |   |
| H77 abs ref                                         |               | 262               | 377  | 720  | 772  | 783  | 875  | 904  | 936  | 1061 | 1663 | 1679 | 1927 | 2013 | 2772 |      |   |
| Amino acid change                                   |               | I→L               | L→V  | I→M  | F→S  | V→A  | W→R  | G→S  | M→V  | I→V  | V→A  | S→C  | N→S  | K→R  | D→A  |      |   |

159

160 † Positions are numbered according to the HCV sequence of J6/JFH1-QC69(NS4A) and with H77 (AF009606) absolute reference

161 numbers. For detailed description see Supplemental Table 1.

162

163 Reference List

164

165 1. **Gottwein JM, Scheel TK, Jensen TB, Ghanem L, Bukh J.** 2011. Differential efficacy of protease inhibitors against HCV

166 genotypes 2a, 3a, 5a, and 6a NS3/4A protease recombinant viruses. *Gastroenterology* **141**:1067-1079.

167 2. **Combet C, Garnier N, Charavay C, Grando D, Crisan D, Lopez J, hne-Garcia A, Geourjon C, Bettler E, Hulo C, Le MP,**  
168 **Bartenschlager R, Diepolder H, Moradpour D, Pawlotsky JM, Rice CM, Trepo C, Penin F, Deleage G.** 2007. euHCVdb: the  
169 European hepatitis C virus database. *Nucleic Acids Res* **35**:D363-D366.
